# Supplementary material for: Arsenic Forms in Soils of Various Settings in the Historical Ore Mining and Processing Site of Radzimowice, Western Sudetes
Source: MDPI journal article supplement (doi:10.3390/min11050491), 2021-05-05
Supplement: s1 [file s1]

Archive with 1 entries (1 files):
- minerals-1171314-supplementary.pdf
