# Supplementary material for: Arsenic Forms in Soils of Various Settings in the Historical Ore Mining and Processing Site of Radzimowice, Western Sudetes
Source: MDPI journal article supplement (doi:10.3390/min11050491), 2021-05-05
Supplement: s1 [file s1 › minerals-1171314-supplementary.pdf]

## Article

# Arsenic in soils of various settings in the historical ore mining and processing site Radzimowice, Western Sudetes

Karolina Lewińska <sup>1</sup>, Agata Duczmal-Czernikiewicz <sup>2</sup>, Anna Karczewska <sup>3</sup>, Agnieszka Dradrach <sup>4</sup>, Muhammad Iqbal <sup>5</sup>

<sup>1</sup> Adam Mickiewicz University in Poznań, Environmental Remote Sensing and Soil Science Research Department, Poznań, Poland, Karolina.lewinska@amu.edu.pl,

<sup>2</sup> Adam Mickiewicz University in Poznań, Institute of Geology, Poznań, Poland, duczer@amu.edu.pl,

<sup>3</sup> Wrocław University of Environmental and Life Sciences, Institute of Soil Science and Environmental Protection, Wrocław, Poland; anna.karczewska@upwr.edu.pl,

<sup>4</sup> Wrocław University of Environmental and Life Sciences, Institute of Agroecology and Plant Production, Wrocław, Poland; agnieszka.dradrach@upwr.edu.pl,

<sup>5</sup> Department of Environmental Sciences and Engineering, Government College University, Faisalabad 38000, Pakistan, iqbal.farhad@gmx.at.

## Supplementary Materials

**Table S1.** Procedure of sequential extraction according to Wenzel et al. (2001)

| Fraction | Supposed As Species                     | Extractant                                                           | Extraction Conditions                           | Soil : Solution Ratio (m:v) | Washing Step                                                                    |
|----------|-----------------------------------------|----------------------------------------------------------------------|-------------------------------------------------|-----------------------------|---------------------------------------------------------------------------------|
| F1       | non-specifically-bound (easily soluble) | 0.05 M (NH <sub>4</sub> ) <sub>2</sub> SO <sub>4</sub>               | 4 h shaking, 20 °C                              | 1:25                        | -                                                                               |
| F2       | specifically bound                      | 0.05 M (NH <sub>4</sub> )H <sub>2</sub> PO <sub>4</sub>              | 16 h shaking, 20 °C                             | 1:25                        | -                                                                               |
| F3       | amorphous hydrous oxide- bound          | 0.2 M NH <sub>4</sub> -oxalate buffer; pH 3.25                       | 4 h shaking in the dark, 20 °C                  | 1:25                        | 0.2 M NH <sub>4</sub> -oxalate, pH 3.25: m:v 1:12.5; 10 min shaking in the dark |
| F4       | crystalline hydrous oxide- bound        | 0.2 M NH <sub>4</sub> -oxalate buffer + 0.1 M ascorbic acid; pH 3.25 | 30 min in a water bath, 96 ± 3 °C, in the light | 1:25                        | 0.2 M NH <sub>4</sub> -oxalate, pH 3.25: m:v 1:12.5; 10 min shaking in the dark |
| F5       | residual                                | HCl:HNO <sub>3</sub> (3:1)                                           | Microwave digestion                             | 1:50                        | -                                                                               |

non-specifically-bound (F1), specifically-bound (F2), amorphous hydrous oxide-bound (F3), crystalline hydrous oxide-bound (F4) and the residual (F5) species

**Table S2.** Mineralogical composition of samples, as determined by microscopic observations

| Components     | Origin        | Occurrence* of Components in the Sample No |      |     |      |      |     |     |      |     |
|----------------|---------------|--------------------------------------------|------|-----|------|------|-----|-----|------|-----|
|                |               | 1                                          | 2    | 3   | 4(S) | 5(S) | 6   | 7   | 8    | 9   |
| Rocks          |               |                                            |      |     |      |      |     |     |      |     |
| Magmatic       | Primary       | +++                                        | +++  | +++ | ++   | +++  | +++ | +++ | +++  | +++ |
| Metamorphic    | Primary       | ++                                         | ++   | ++  | ++   | ++   | ++  | ++  | ++   | ++  |
| Minerals       |               |                                            |      |     |      |      |     |     |      |     |
| Quartz         | Primary       | ++                                         | +    | +++ | ++   | ++   | ++  | ++  | ++   | ++  |
| K-feldspar     | Primary       | +++                                        | ++++ | ++  | +++  | +++  | +++ | +++ | +++  | +++ |
| Muscovite      | Primary       | ++                                         | ++   | ++  | ++   | ++   | ++  | ++  | ++   | ++  |
| Ti-oxide       | Primary       | –                                          | +    | –   | –    | –    | –   | –   | –    | –   |
| Calcite        | Hydrothermal  | –                                          | ++   | –   | –    | –    | –   | +   | –    | –   |
| Piryte         | Hydrothermal  | –                                          | ++   | +   | +    | –    | –   | –   | –    | –   |
| Pihrotyte      | Hydrothermal  | –                                          | +    | +   | –    | –    | –   | –   | –    | –   |
| Arsenopyrite   | Hydrothermal  | +                                          | ++++ | ++  | –    | –    | –   | +   | –    | –   |
| Chalcopyrite   | Hydrothermal  | –                                          | +++  | +   | –    | –    | –   | –   | –    | –   |
| Goethite       | Secondary     | ++                                         | ++   | +   | +++  | ++++ | +++ | +++ | +    | +   |
| Hematite       | Secondary     | +                                          | ++   | +   | ++   | ++   | +   | +   | +    | +   |
| Organic matter | Secondary     | +                                          | ++   | +++ | +    | ++   | +++ | ++  | ++++ | +   |
| Glass or slag  | Anthropogenic | +                                          | –    | –   | +    | +    | +   | +   | +    | –   |

\* Explanations:

Frequency of occurrence: ++++ very often; +++ often, ++rarely, + very rarely; – absent (not detected)

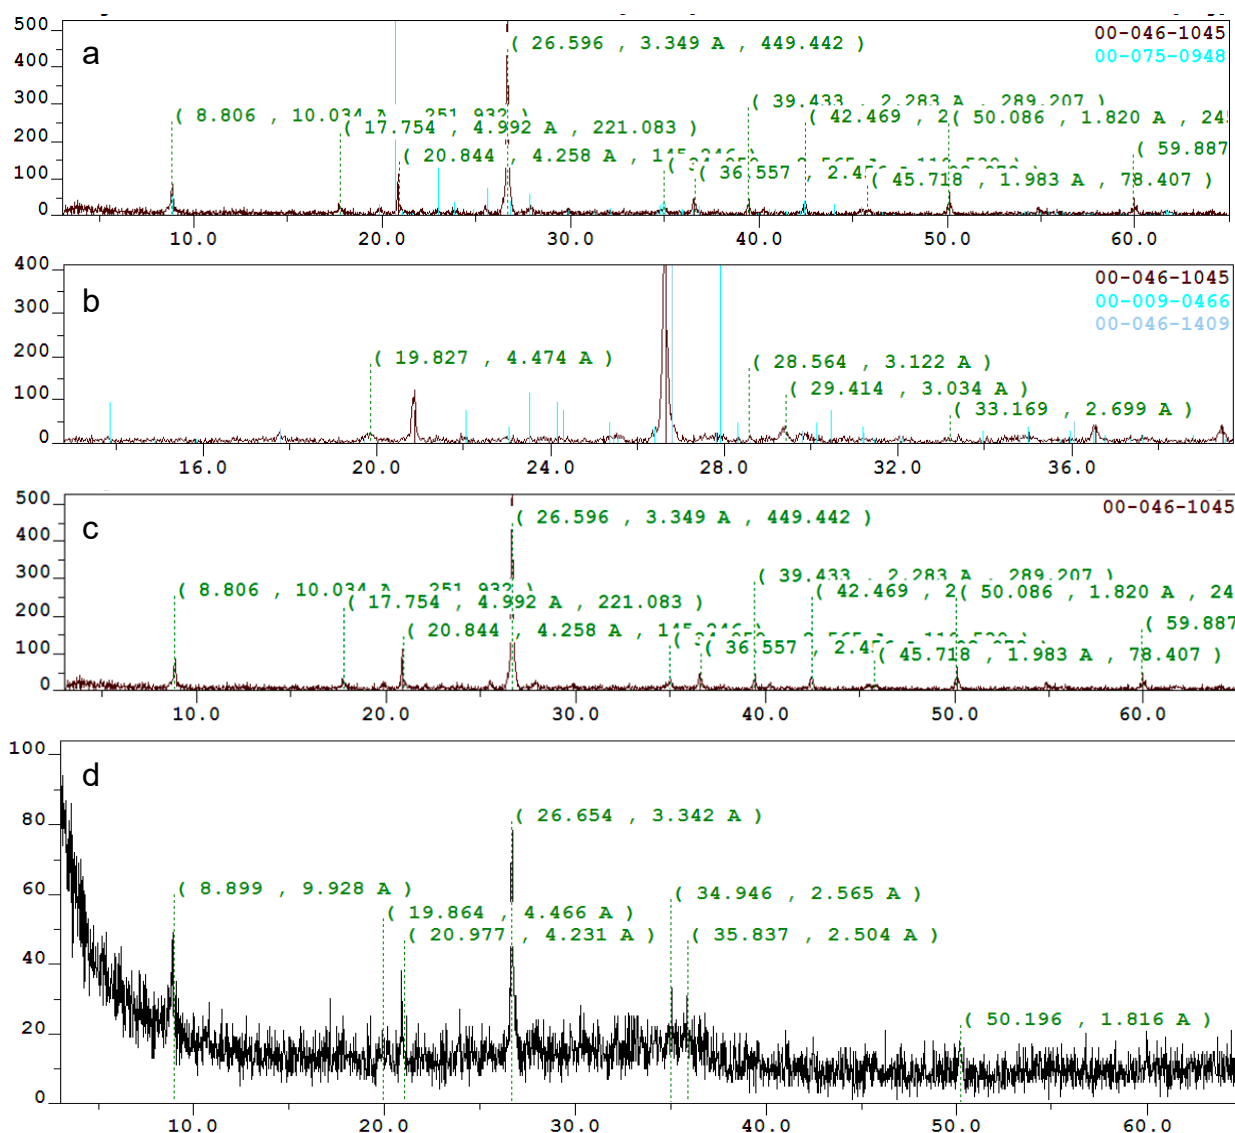

**Figure S1.** Examples of representative XRD diffractograms that identify the main rock forming minerals in soil samples: a) Quartz (black) and muscovite (blue) in the dump sample No 2, b) K-Feldspar (albite) in powdered subsample No 2; c) Quartz in the sample of stream sediments No 4(S), d) Quartz, goethite, clay minerals and poorly crystalline minerals in the sample of sediments No 5(S). Possible occurrence of scorodite
